# Supplementary material
Source: PubMed Central journal article supplement (PMC8261476)

# ARID1A

A

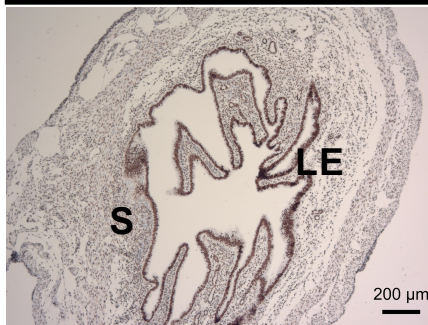

B

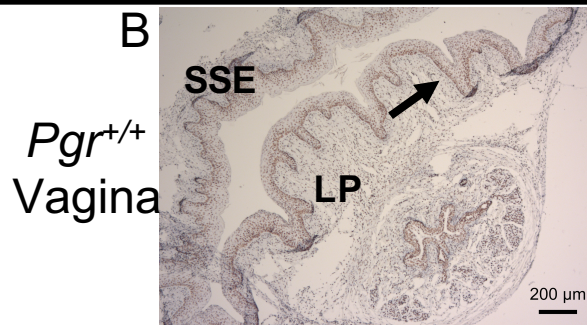

C

AKP  
Uterus

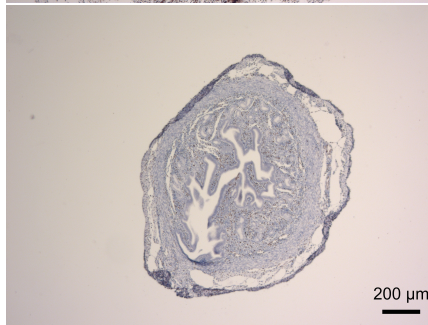

D

AKP  
Vagina

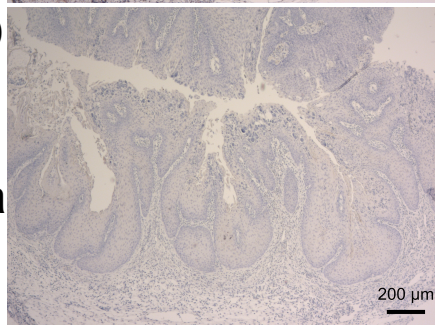

# KRAS-G12D; DAPI

E

*Pgr*<sup>+/+</sup>  
Uterus

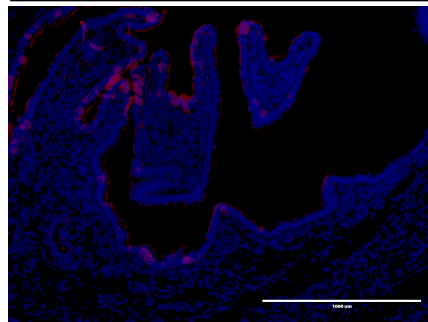

F

*Pgr*<sup>+/+</sup>  
Vagina

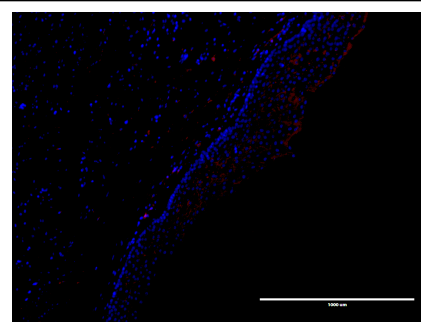

G

AKP  
Uterus

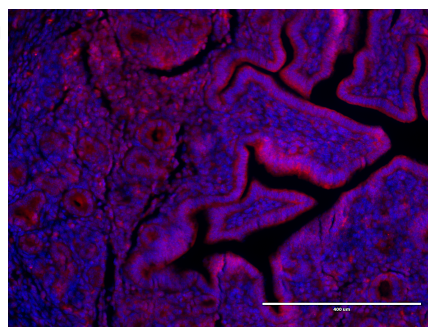

H

AKP  
Vagina

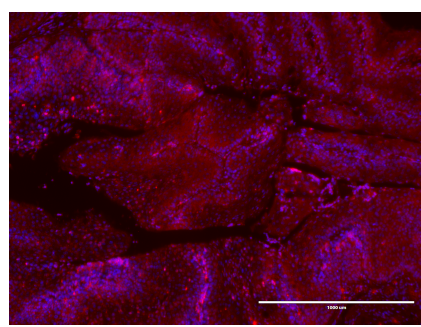

Supplement: mmc2.pdf [file mmc2.pdf]
