# Supplementary material
Source: PubMed Central journal article supplement (PMC8261476)

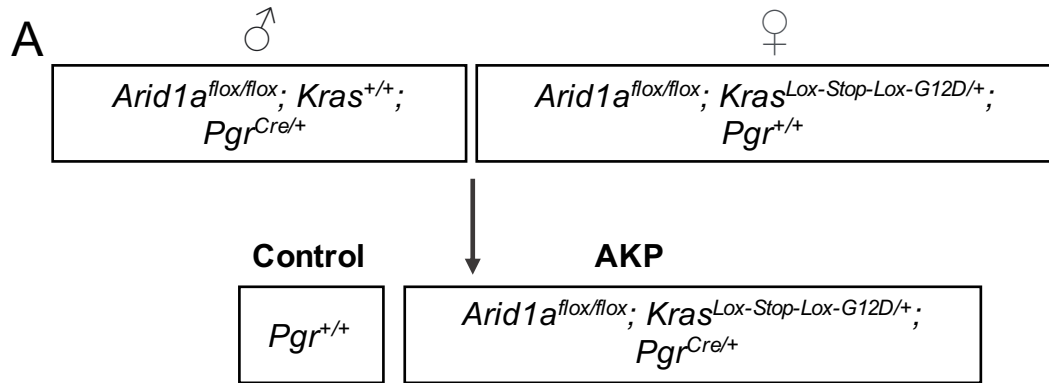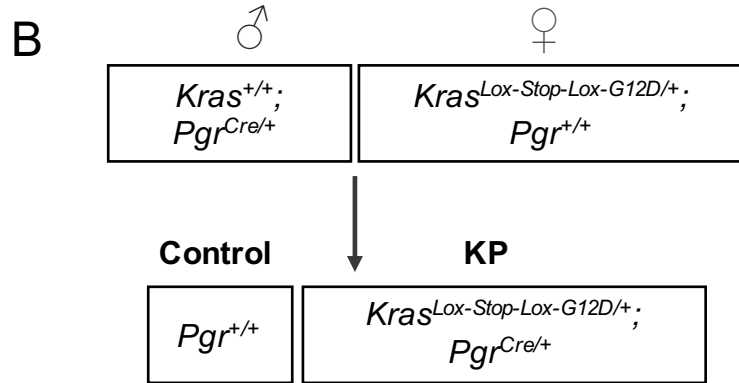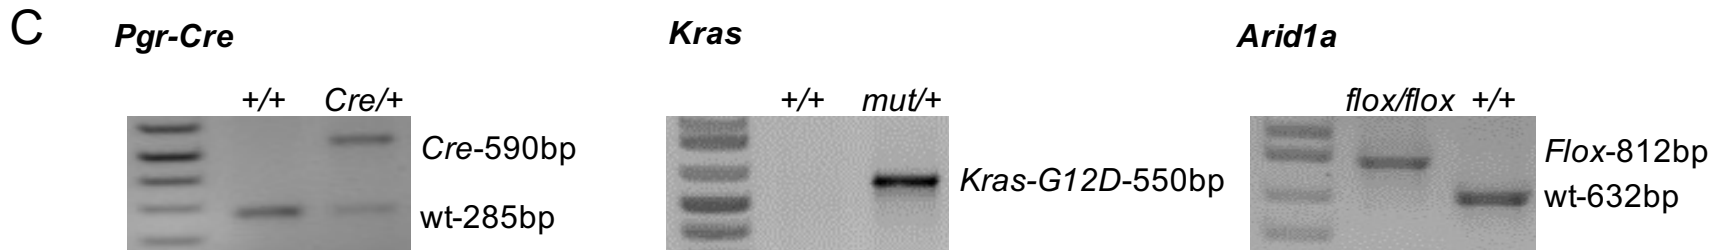

Supplement: mmc1.pdf [file mmc1.pdf]

**A****Intact****B****Ov'ex - sham****C****Ov'ex - E2***Pgr*<sup>+/+</sup>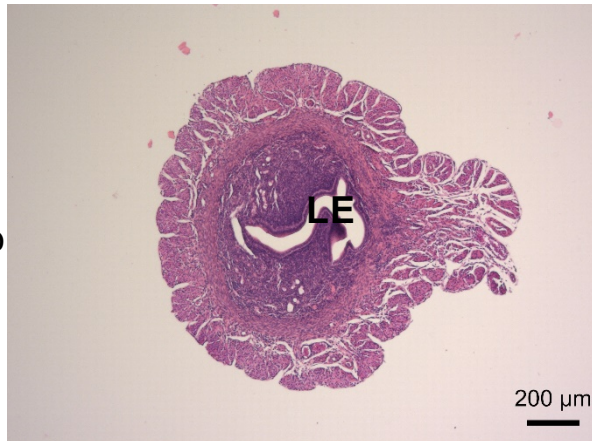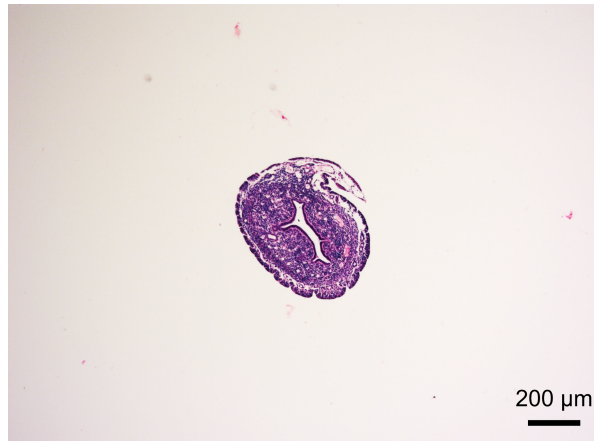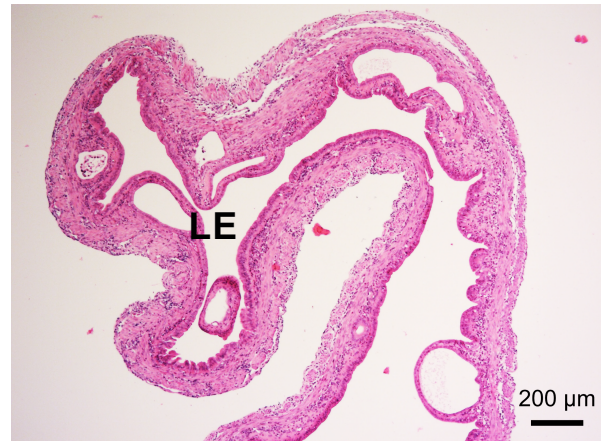*AKP*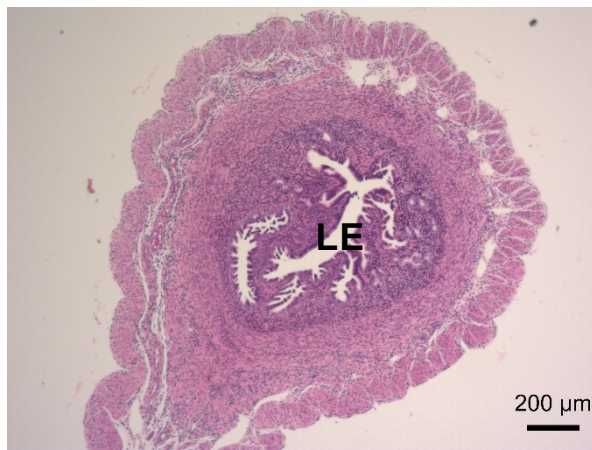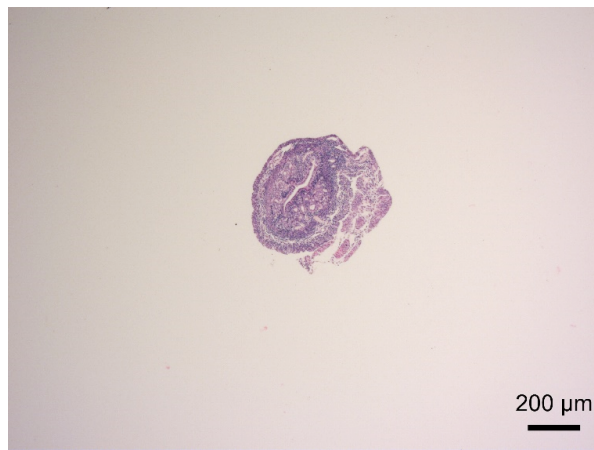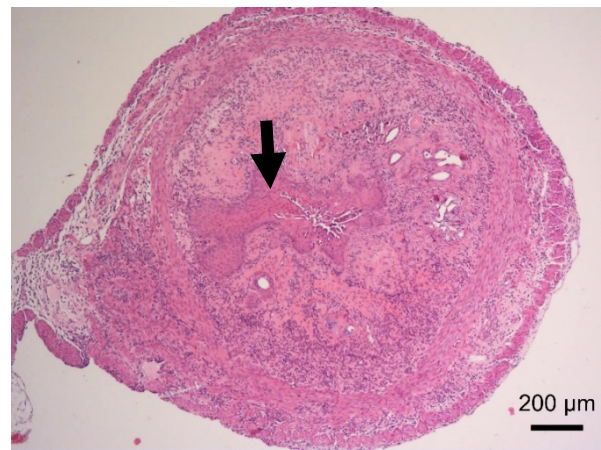

Supplement: mmc10.pdf [file mmc10.pdf]

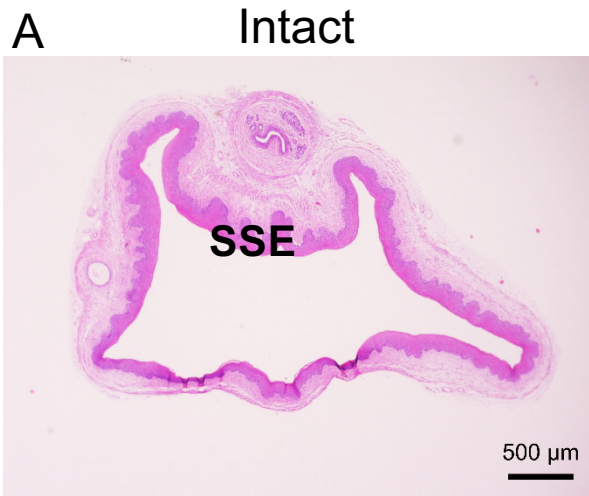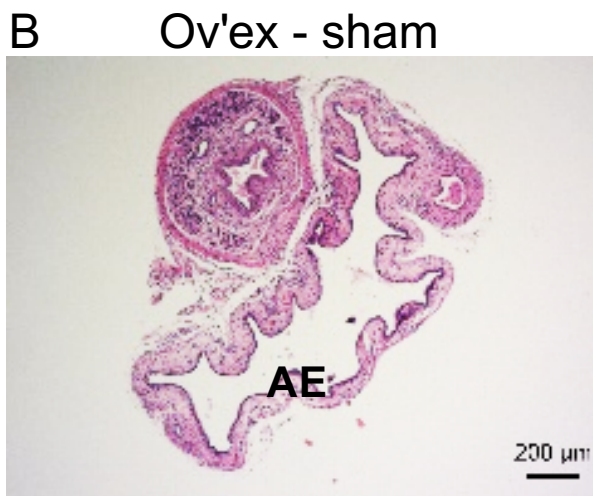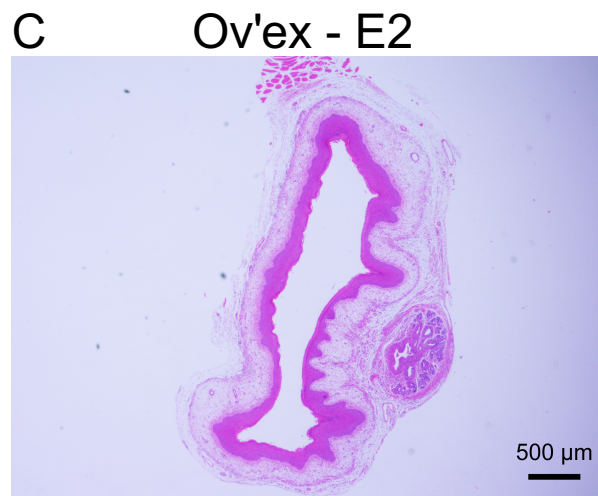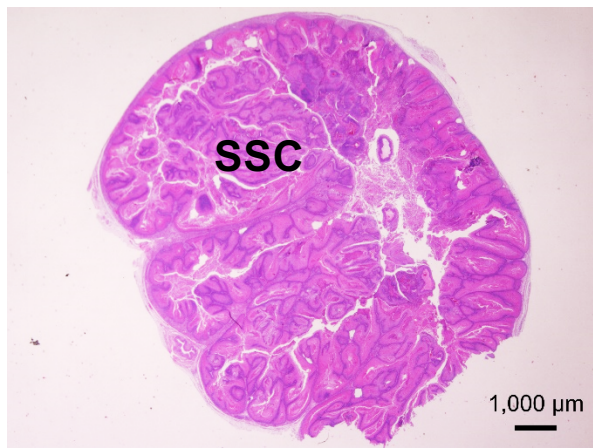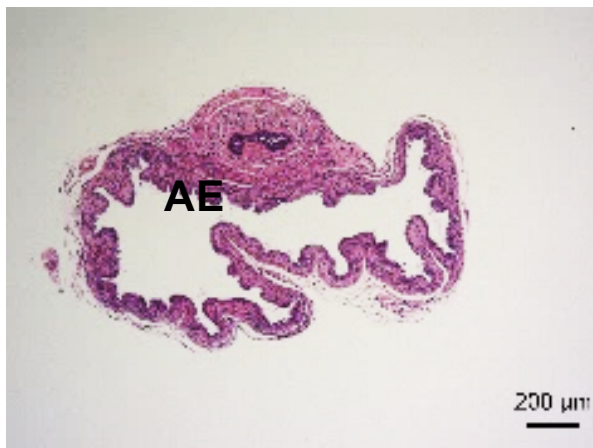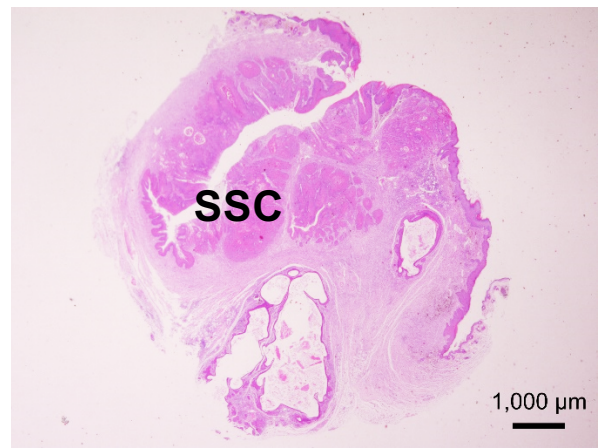

Supplement: mmc11.pdf [file mmc11.pdf]

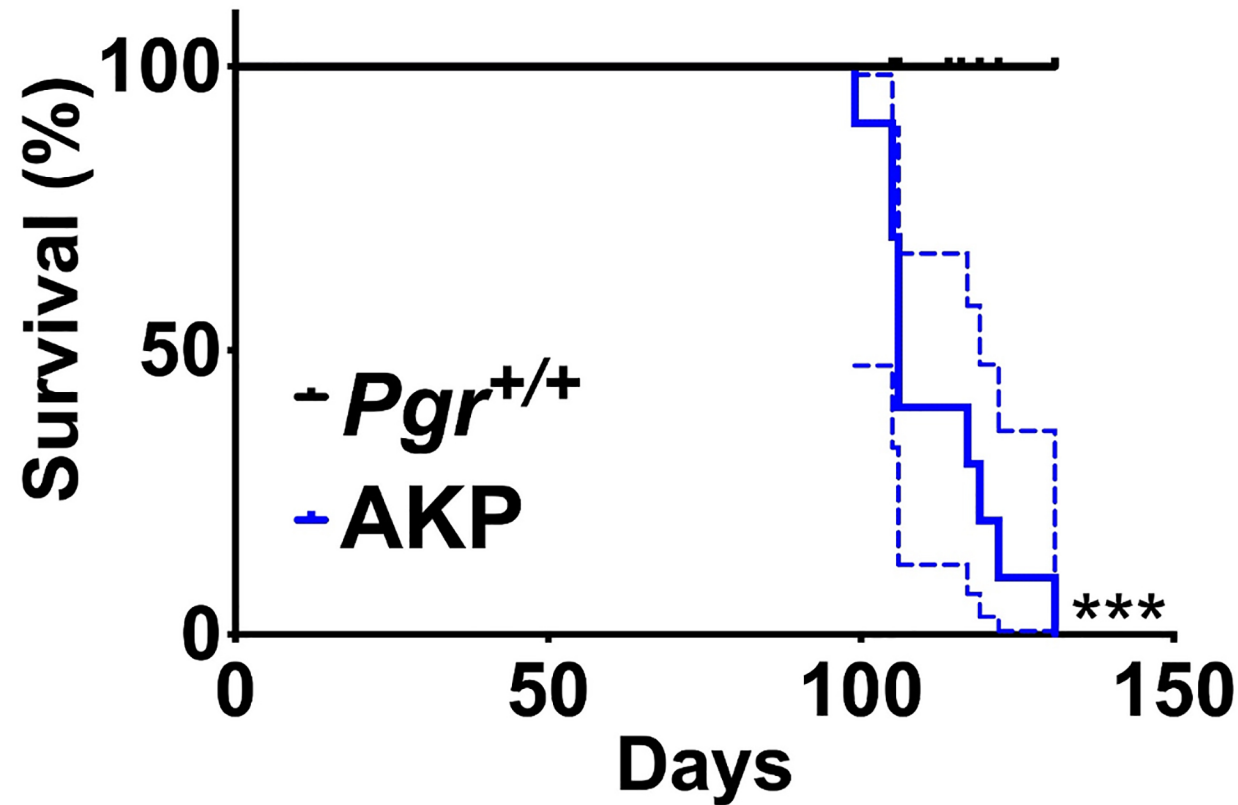

Supplement: mmc3.pdf [file mmc3.pdf]

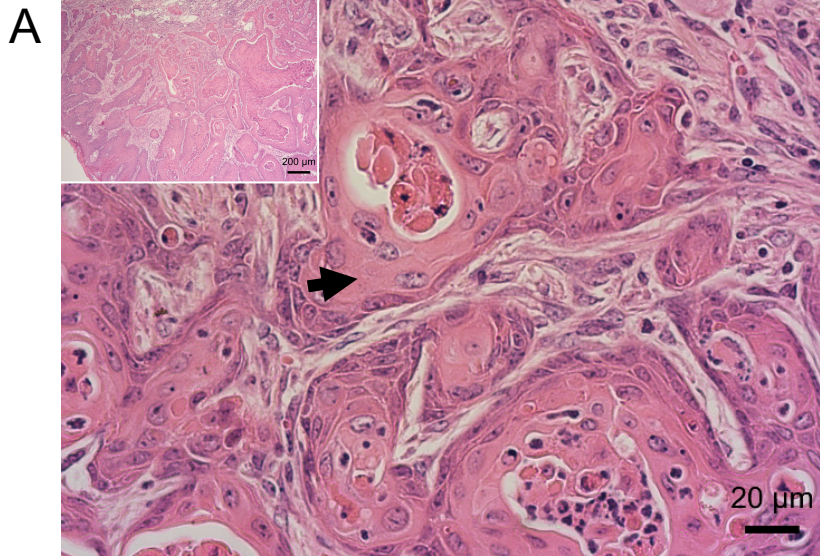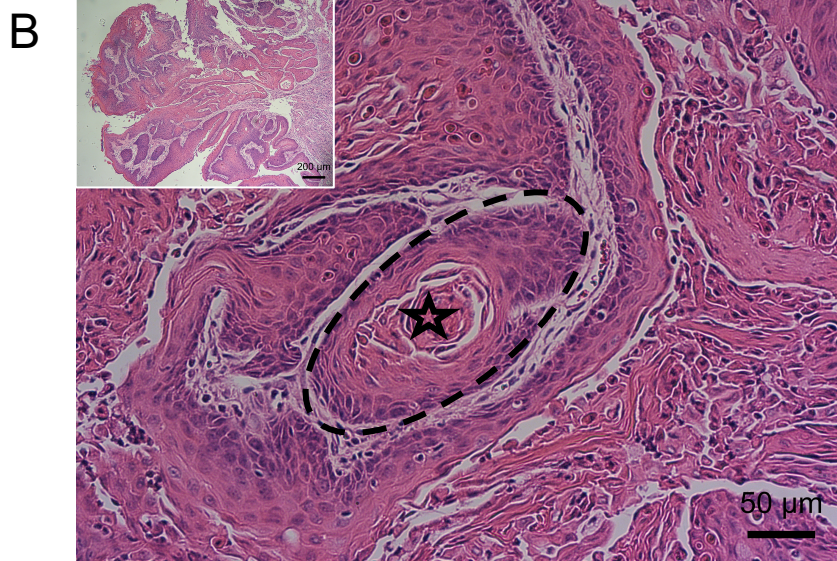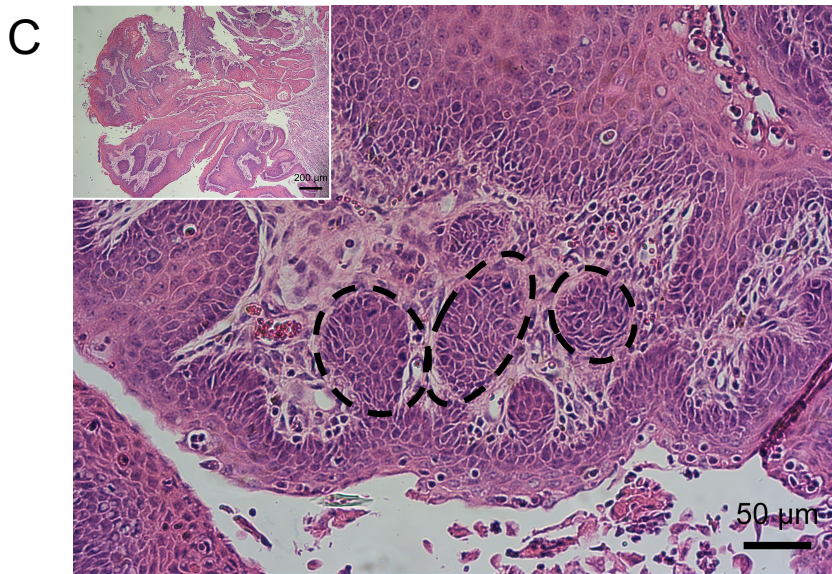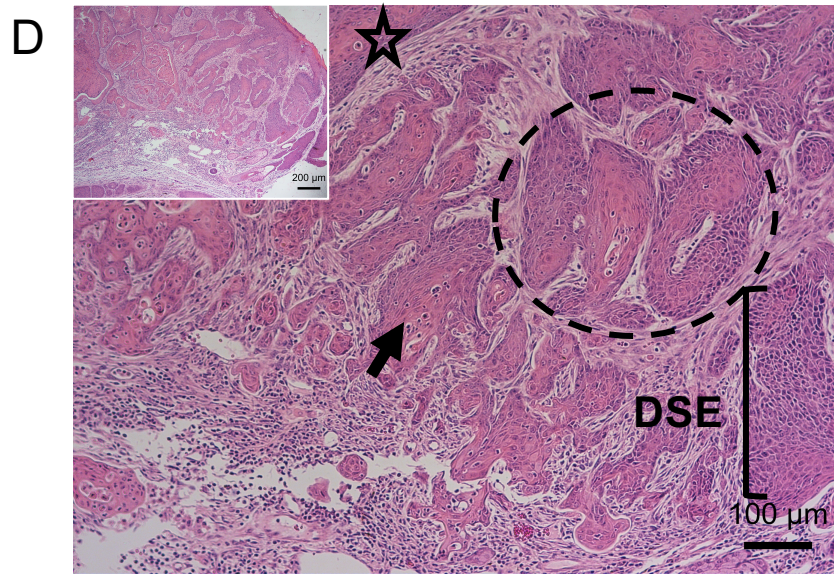

Supplement: mmc4.pdf [file mmc4.pdf]

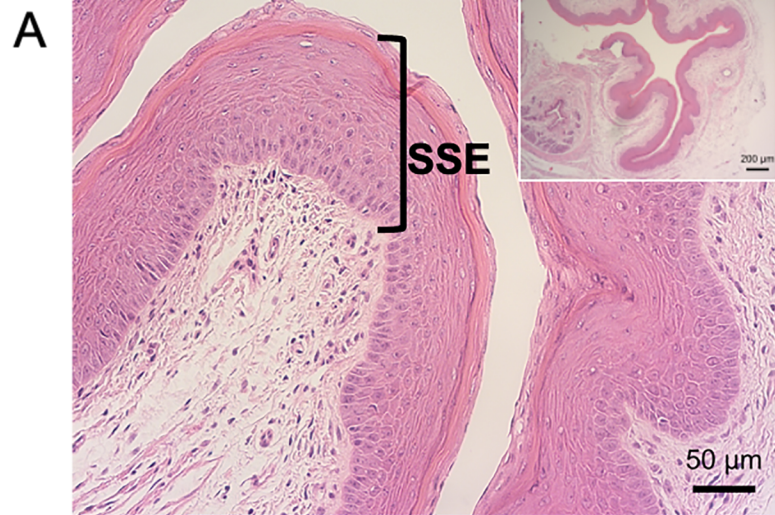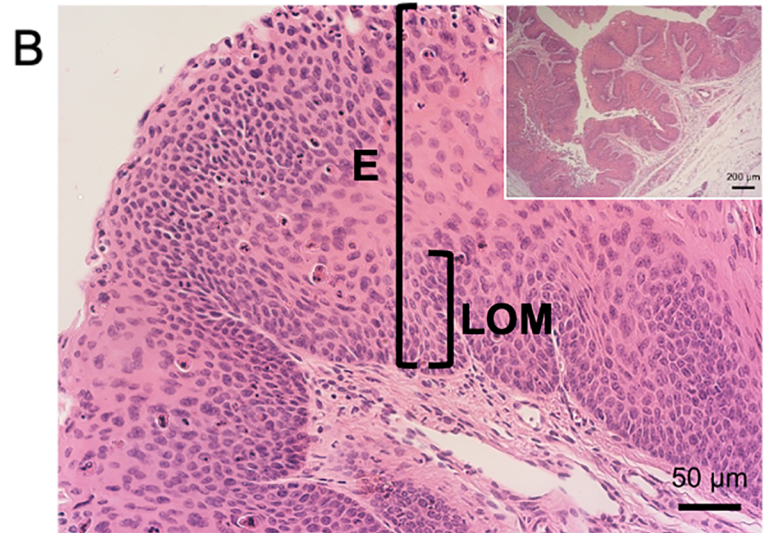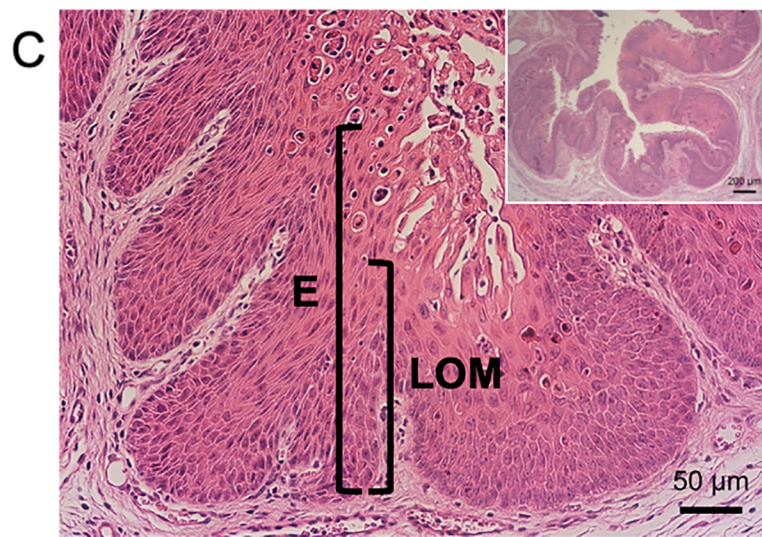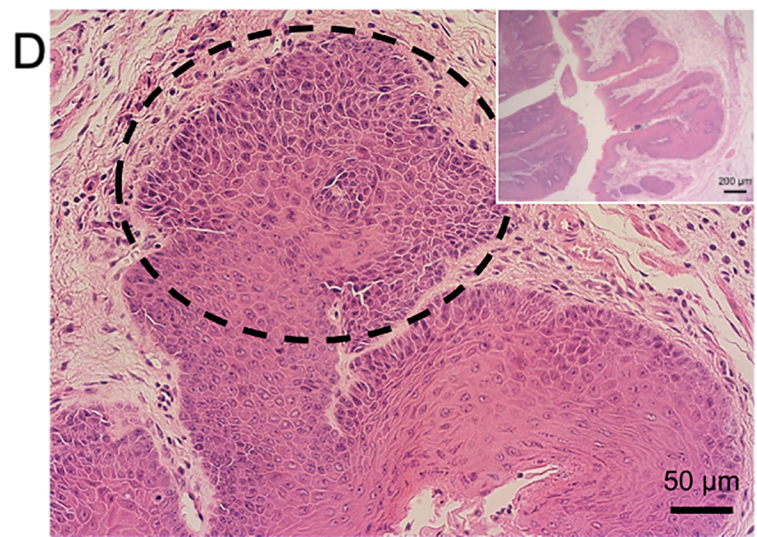

Supplement: mmc5.pdf [file mmc5.pdf]

**A**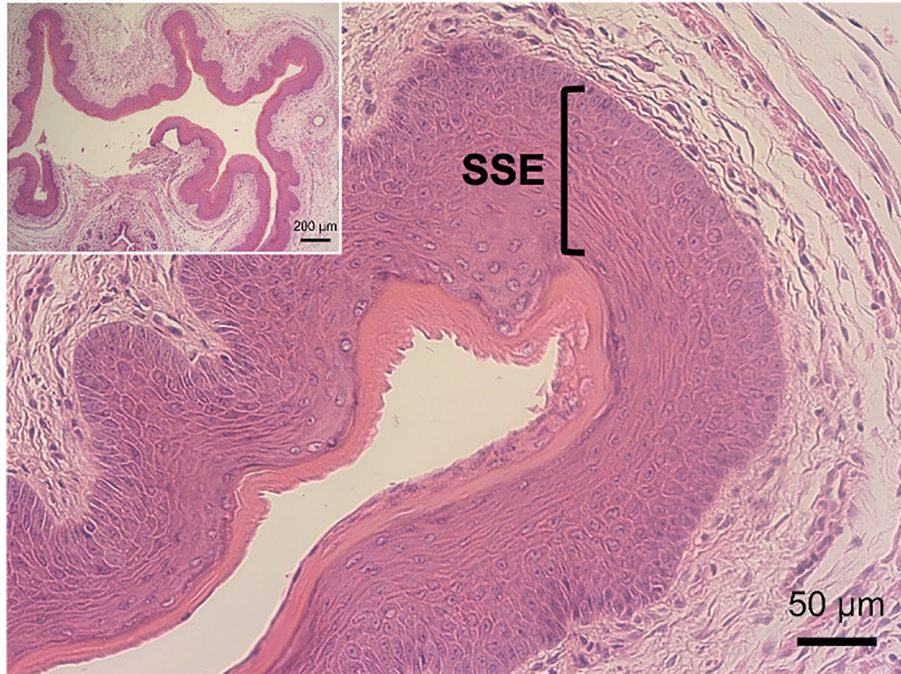**B**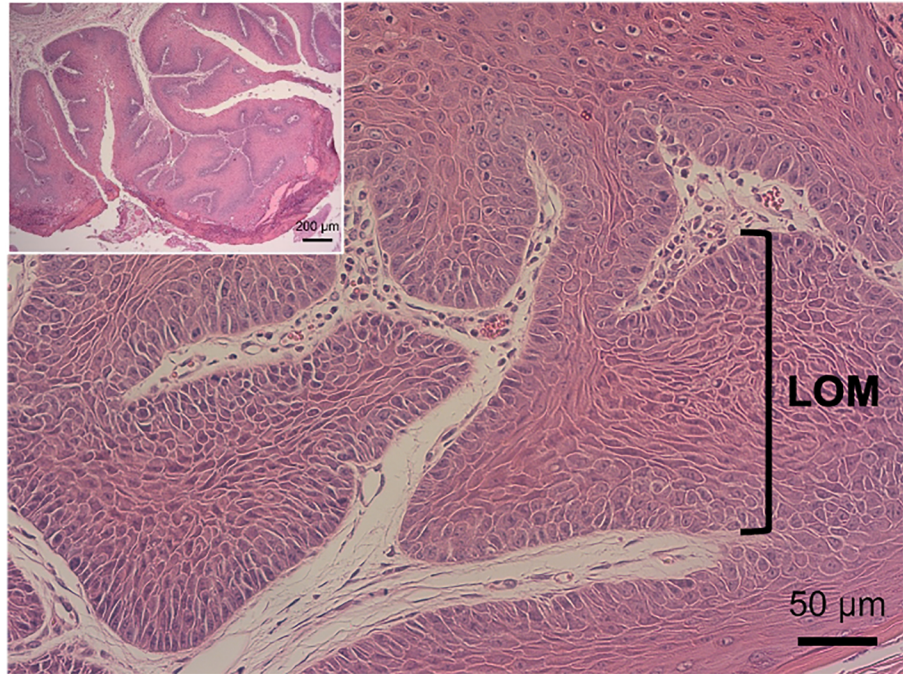

Supplement: mmc6.pdf [file mmc6.pdf]

**A**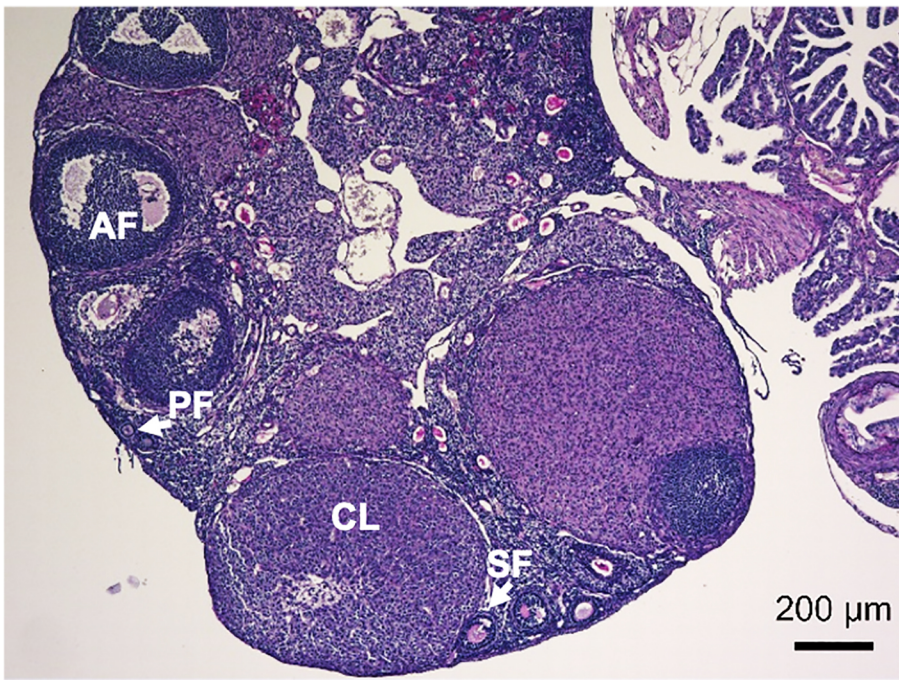**B**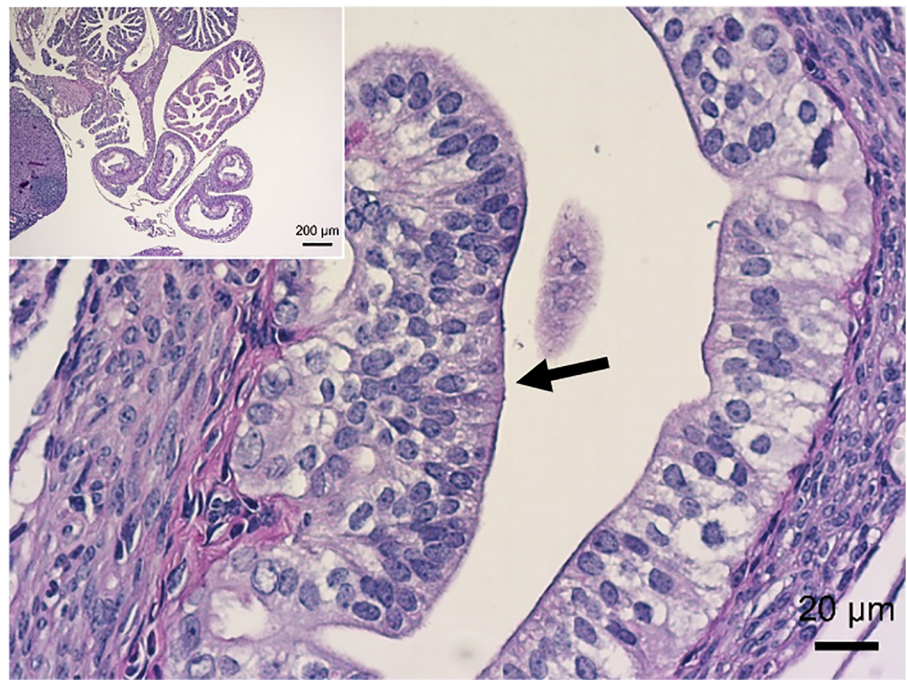

Supplement: mmc7.pdf [file mmc7.pdf]

**A**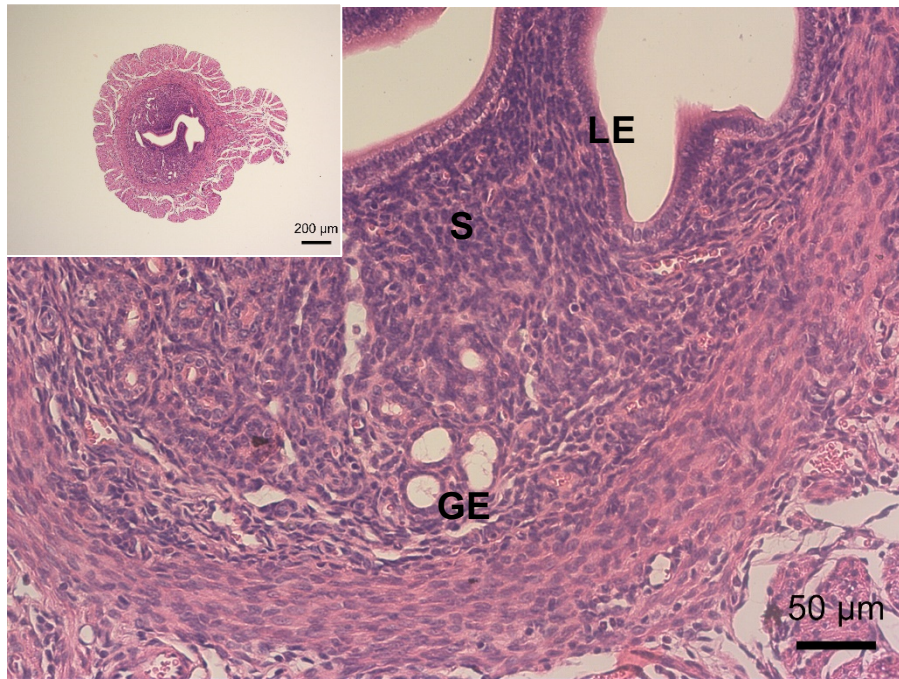**B**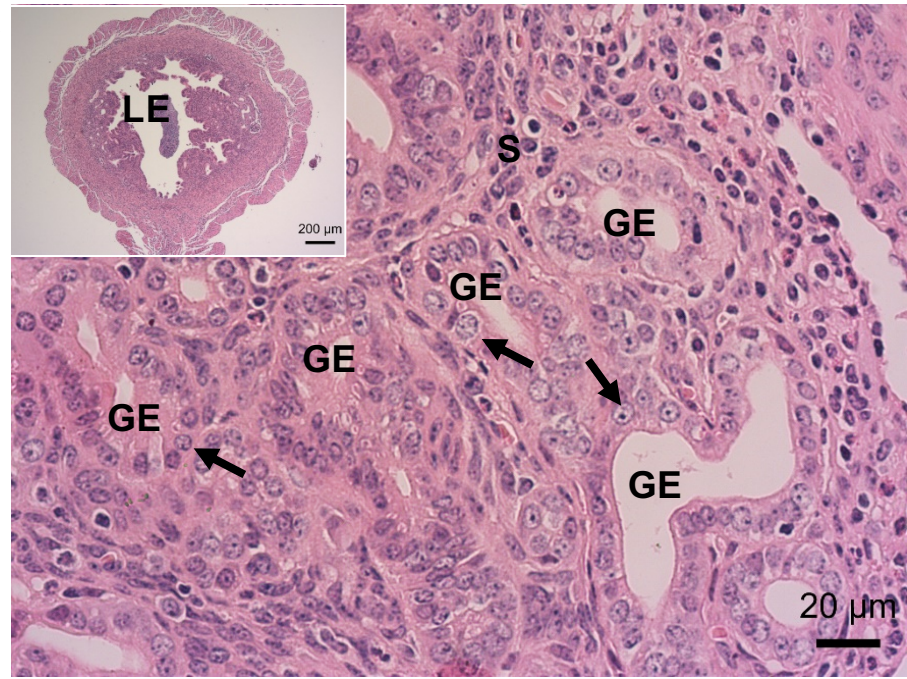

Supplement: mmc8.pdf [file mmc8.pdf]

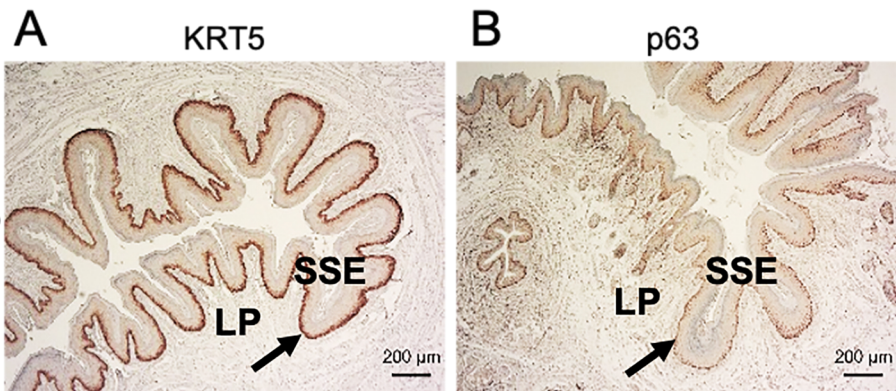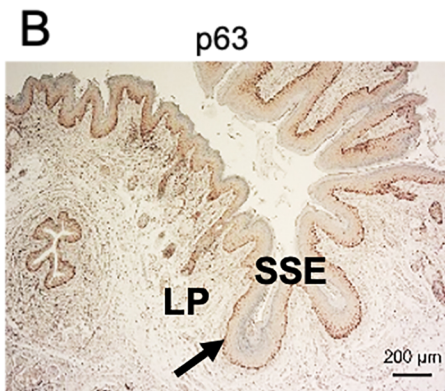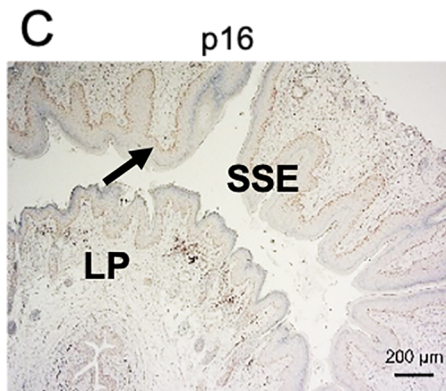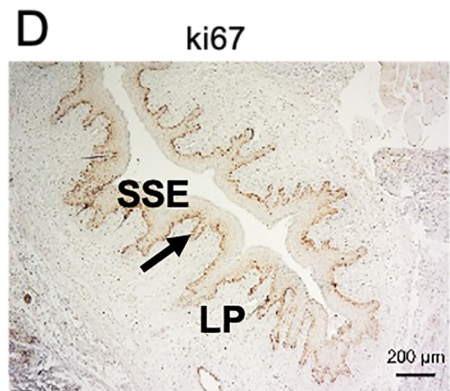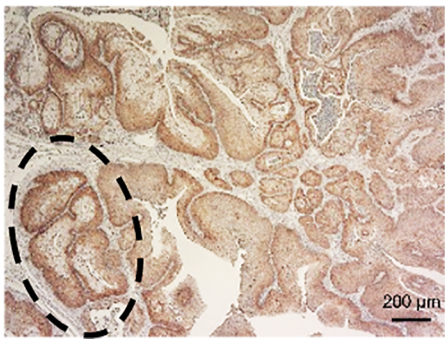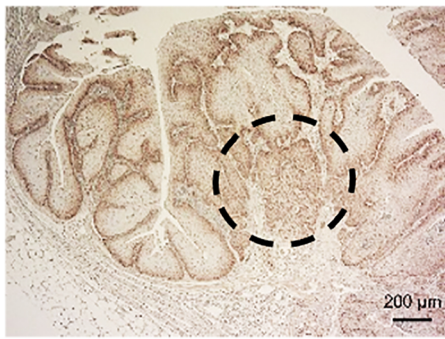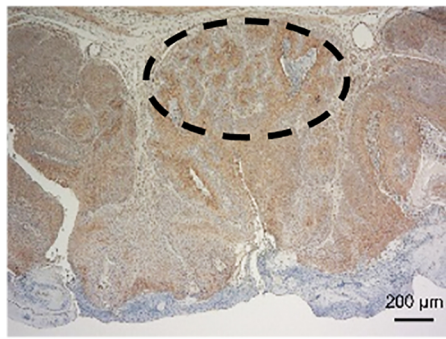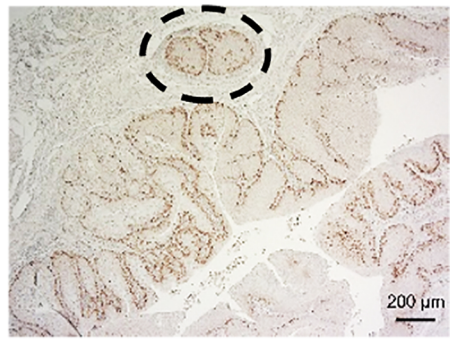

Supplement: mmc9.pdf [file mmc9.pdf]
